# Supplementary material for: Persistence with dimethyl fumarate in relapsing-remitting multiple sclerosis: a population-based cohort study
Source: PubMed Central journal article supplement (PMC5765201; doi:10.1007/s00228-017-2366-4), 2017-11-11
Supplement: 228_2017_2366_MOESM1_ESM.pdf [file 228_2017_2366_MOESM1_ESM.pdf]

### Online Resource 1. MS DMTs available in the Stockholm County during the study period

| <b>MS DMT</b>         | <b>Brand name</b> | <b>ATC code</b> | <b>Data source</b>                              |
|-----------------------|-------------------|-----------------|-------------------------------------------------|
| interferon-beta-1a    | Avonex            | L03AB07         | outpatient pharmacy dispensation data           |
|                       | Rebif             | L03AB07         | outpatient pharmacy dispensation data           |
| peginterferon-beta-1a | Plegridy          | L03AB13         | outpatient pharmacy dispensation data           |
| interferon-beta-1b    | Betaferon         | L03AB08         | outpatient pharmacy dispensation data           |
|                       | Extavia           | L03AB08         | outpatient pharmacy dispensation data           |
| glatiramer acetate    | Copaxone          | L03AX13         | outpatient pharmacy dispensation data           |
| fingolimod            | Gilenya           | L04AA27         | outpatient pharmacy dispensation data           |
| dimethyl fumarate     | Tecfidera         | N07XX09         | outpatient pharmacy dispensation data           |
| teriflunomide         | Aubagio           | L04AA31         | outpatient pharmacy dispensation data           |
| natalizumab           | Tysabri           | L04AA23         | inpatient and outpatient specialist visits data |
| alemtuzumab           | Lemtrada          | L04AA34         | inpatient and outpatient specialist visits data |
| daclizumab            | Zinbryta          | L04AC01         | outpatient pharmacy dispensation data           |
| rituximab             | MabThera          | L01XC02         | inpatient and outpatient specialist visits data |
