# Supplementary material for: Persistence with dimethyl fumarate in relapsing-remitting multiple sclerosis: a population-based cohort study
Source: PubMed Central journal article supplement (PMC5765201; doi:10.1007/s00228-017-2366-4), 2017-11-11
Supplement: 228_2017_2366_MOESM2_ESM.pdf [file 228_2017_2366_MOESM2_ESM.pdf]

## Online Resource 2. Comorbidity definitions

| Comorbidity    | ICD-10 code                                                                                                                                                                                                                                                                                                                                                                                                                                                                                                                       | Setting                                        | Position                       |
|----------------|-----------------------------------------------------------------------------------------------------------------------------------------------------------------------------------------------------------------------------------------------------------------------------------------------------------------------------------------------------------------------------------------------------------------------------------------------------------------------------------------------------------------------------------|------------------------------------------------|--------------------------------|
| Anxiety        | F40, F41, F42, F43.1                                                                                                                                                                                                                                                                                                                                                                                                                                                                                                              | Inpatient, outpatient specialist, primary care | Primary or secondary diagnosis |
| Depression     | F32, F33, F34, F38, F39                                                                                                                                                                                                                                                                                                                                                                                                                                                                                                           | Inpatient, outpatient specialist, primary care | Primary or secondary diagnosis |
| Hypertension   | I10, I11, I12, I13, I15                                                                                                                                                                                                                                                                                                                                                                                                                                                                                                           | Inpatient, outpatient specialist, primary care | Primary or secondary diagnosis |
| Hyperlipidemia | E78.0, E78.2, E78.4, E78.5                                                                                                                                                                                                                                                                                                                                                                                                                                                                                                        | Inpatient, outpatient specialist, primary care | Primary or secondary diagnosis |
| Diabetes       | E10, E11, E12, E13, E14                                                                                                                                                                                                                                                                                                                                                                                                                                                                                                           | Inpatient, outpatient specialist, primary care | Primary or secondary diagnosis |
| Pain           | G50.1, H57.1, H92.0, K10.2, K14.6, M25.5, M25.5B, M25.5C, M25.5D, M25.5E, M25.5F, M25.5G, M25.5H, M53.0, M53.1, M53.9, M54.2, M54.3, M54.4, M54.5, M54.6, M54.9, M77.4, M79.1, M79.1B, M79.1C, M79.1D, M79.1E, M79.1F, M79.1G, M79.1H, M79.2, M79.6, M79.6B, M79.6C, M79.6D, M79.6E, M79.6F, M79.6G, M79.6H, M79.9, R07.0, R07.1, R07.2, R07.3, R07.4, R09.1, R10.1, R10.2, R10.3, R10.4, R10.4X, R51.9, R52.9, H92.0, M53.0, M53.1, M54.2, M54.3, M54.4, M54.5, M54.6, M54.9P, M79.1, R07-P, R10.1, R10.3P, R10.4P, R51.-, R52.- | Inpatient, outpatient specialist, primary care | Primary or secondary diagnosis |

## Online Resource 2. Comedication definitions

| <b>Comedication</b>                                          | <b>ATC code</b> |
|--------------------------------------------------------------|-----------------|
| Drugs for peptic ulcer and gastro-oesophageal reflux disease | A02B            |
| Drugs for constipation                                       | A06A            |
| Vitamin A and D, incl. combinations of the two               | A11C            |
| Vitamin B12 and folic acid                                   | B03B            |
| Corticosteroids for systemic use, plain                      | H02A            |
| Thyroid preparations                                         | H03A            |
| Tetracyclines, beta-lactam antibacterials, penicillins       | J01A, J01C      |
| Antiinflammatory and antirheumatic products, non-steroids    | M01A            |
| Opioids                                                      | N02A            |
| Other analgesics and antipyretics                            | N02B            |
| Antimigraine preparations                                    | N02C            |
| Antiepileptics                                               | N03A            |
| Anxiolytics                                                  | N05B            |
| Hypnotics and sedatives                                      | N05C            |
| Antidepressants                                              | N06A            |
