# Supplementary material for: Persistence with dimethyl fumarate in relapsing-remitting multiple sclerosis: a population-based cohort study
Source: PubMed Central journal article supplement (PMC5765201; doi:10.1007/s00228-017-2366-4), 2017-11-11
Supplement: 228_2017_2366_MOESM3_ESM.pdf [file 228_2017_2366_MOESM3_ESM.pdf]

**Online Resource 3. Baseline characteristics of patients initiating DMF – comorbidities**

|                | <b>Treatment-naïve DMF patients<br/>N = 156</b> | <b>Patients switching to DMF from other DMTs<br/>N = 244</b> |
|----------------|-------------------------------------------------|--------------------------------------------------------------|
| N (%)          |                                                 |                                                              |
| Anxiety        | 6 (4%)                                          | 14 (6%)                                                      |
| Depression     | 5 (3%)                                          | 9 (4%)                                                       |
| Hypertension   | 1 (1%)                                          | 11 (5%)                                                      |
| Hyperlipidemia | 0 (0%)                                          | 0 (0%)                                                       |
| Diabetes       | 1 (1%)                                          | 5 (2%)                                                       |
| Pain           | 49 (31%)                                        | 74 (30%)                                                     |

### Online Resource 3. Baseline characteristics of patients initiating DMF – comedications

|                                                              | <b>Treatment-naïve DMF patients<br/>N = 156</b> | <b>Patients switching to DMF from other DMTs<br/>N = 244</b> |
|--------------------------------------------------------------|-------------------------------------------------|--------------------------------------------------------------|
| N (%)                                                        |                                                 |                                                              |
| Drugs for peptic ulcer and gastro-oesophageal reflux disease | 19 (12%)                                        | 44 (18%)                                                     |
| Vitamin A and D, including combinations of the two           | 13 (8%)                                         | 16 (7%)                                                      |
| Vitamin B12 and folic acid                                   | 7 (4%)                                          | 24 (10%)                                                     |
| Corticosteroids for systemic use, plain                      | 24 (15%)                                        | 41 (17%)                                                     |
| Tetracyclines, beta-lactam antibacterials, penicillins       | 36 (23%)                                        | 68 (28%)                                                     |
| Antiinflammatory and antirheumatic products, non-steroids    | 35 (22%)                                        | 92 (38%)                                                     |
| Opioids                                                      | 18 (12%)                                        | 27 (11%)                                                     |
| Other analgesics and antipyretics                            | 20 (13%)                                        | 123 (50%)                                                    |
| Antiepileptics                                               | 12 (8%)                                         | 18 (7%)                                                      |
| Anxiolytics                                                  | 19 (12%)                                        | 30 (12%)                                                     |
| Hypnotics and sedatives                                      | 34 (22%)                                        | 49 (20%)                                                     |
| Antidepressants                                              | 19 (12%)                                        | 53 (22%)                                                     |

**Online Resource 3. Baseline characteristics of patients initiating DMF – healthcare resource utilization in the past year**

|                                                      | <b>Treatment-naïve DMF patients<br/>N = 156</b> | <b>Patients switching to DMF from other DMTs<br/>N = 244</b> |
|------------------------------------------------------|-------------------------------------------------|--------------------------------------------------------------|
| Among all patients                                   |                                                 |                                                              |
| number of hospitalizations, mean (SD)                | 0.7 (0.9)                                       | 0.4 (0.9)                                                    |
| in-hospital days, mean (SD)                          | 3.9 (9.0)                                       | 2.0 (7.8)                                                    |
| Patients with at least one hospital admission, N (%) | 77 (49%)                                        | 52 (21%)                                                     |
| Among patients with at least one hospital admission  |                                                 |                                                              |
| number of hospitalizations, mean (SD)                | 1.4 (0.8)                                       | 1.7 (1.4)                                                    |
| in-hospital days, mean (SD)                          | 8.0 (12.0)                                      | 9.3 (14.8)                                                   |
| Number of outpatient specialist visits, mean (SD)    | 5.8 (4.0)                                       | 5.4 (4.1)                                                    |
| Number of primary care visits, mean (SD)             | 2.3 (2.7)                                       | 2.2 (2.5)                                                    |
| Number of medication classes dispensed, mean (SD)    | 3.4 (3.2)                                       | 6.0 (4.4)                                                    |
