# Supplementary material for: Persistence with dimethyl fumarate in relapsing-remitting multiple sclerosis: a population-based cohort study
Source: PubMed Central journal article supplement (PMC5765201; doi:10.1007/s00228-017-2366-4), 2017-11-11
Supplement: 228_2017_2366_MOESM4_ESM.pdf [file 228_2017_2366_MOESM4_ESM.pdf]

**Online Resource 4. Switching patterns during the follow-up period (first switching only)**

|                                           | Switched to      |                    |            |               |             |             |           |           |
|-------------------------------------------|------------------|--------------------|------------|---------------|-------------|-------------|-----------|-----------|
|                                           | Interferon-betas | Glatiramer acetate | Fingolimod | Teriflunomide | Natalizumab | Alemtuzumab | Rituximab | Total     |
| One year follow-up, N (%)                 |                  |                    |            |               |             |             |           |           |
| Treatment-naïve DMF patients              | 1 (3%)           | 2 (6%)             | 3 (10%)    | 2 (6%)        | 1 (3%)      | 0 (0%)      | 22 (71%)  | 31 (100%) |
| Patients switching to DMF from other DMTs | 7 (14%)          | 3 (6%)             | 3 (6%)     | 4 (8%)        | 6 (12%)     | 0 (0%)      | 26(53%)   | 49 (100%) |
| Two year follow-up, N (%)                 |                  |                    |            |               |             |             |           |           |
| Treatment-naïve DMF patients              | 2 (4%)           | 2 (4%)             | 4 (8%)     | 3 (6%)        | 1 (2%)      | 0 (0%)      | 39 (76%)  | 51 (100%) |
| Patients switching to DMF from other DMTs | 9 (11%)          | 3 (4%)             | 4 (5%)     | 7 (8%)        | 9 (11%)     | 1 (1%)      | 50 (60%)  | 83 (100%) |
| All follow-up, N (%)                      |                  |                    |            |               |             |             |           |           |
| Treatment-naïve DMF patients              | 2 (3%)           | 2 (3%)             | 5 (9%)     | 3 (5%)        | 1 (2%)      | 0 (0%)      | 45 (78%)  | 58 (100%) |
| Patients switching to DMF from other DMTs | 9 (9%)           | 3 (3%)             | 4 (4%)     | 9 (9%)        | 10 (11%)    | 1 (1%)      | 59 (62%)  | 95 (100%) |
