# Supplementary material for: Persistence with dimethyl fumarate in relapsing-remitting multiple sclerosis: a population-based cohort study
Source: PubMed Central journal article supplement (PMC5765201; doi:10.1007/s00228-017-2366-4), 2017-11-11

**Online Resource 5. Persistence with DMF in all patients initiating DMF**  
**Treatment gap = 60 days**

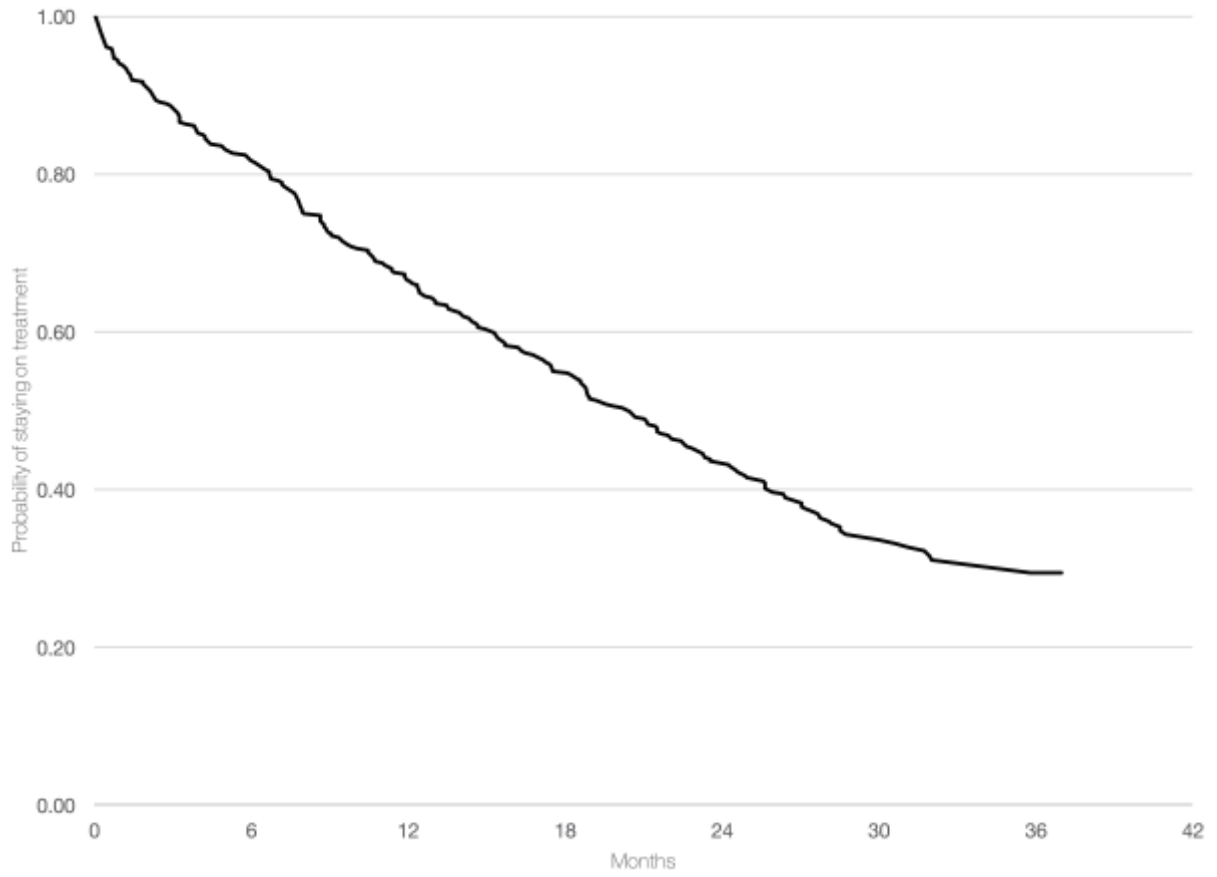

Supplement: 228_2017_2366_MOESM5_ESM.pdf [file 228_2017_2366_MOESM5_ESM.pdf]
