# Supplementary material for: Persistence with dimethyl fumarate in relapsing-remitting multiple sclerosis: a population-based cohort study
Source: PubMed Central journal article supplement (PMC5765201; doi:10.1007/s00228-017-2366-4), 2017-11-11

**Online Resource 6. Sensitivity analyses**

Treatment gap = 30 days  
Persistence with DMF in all patients initiating DMF

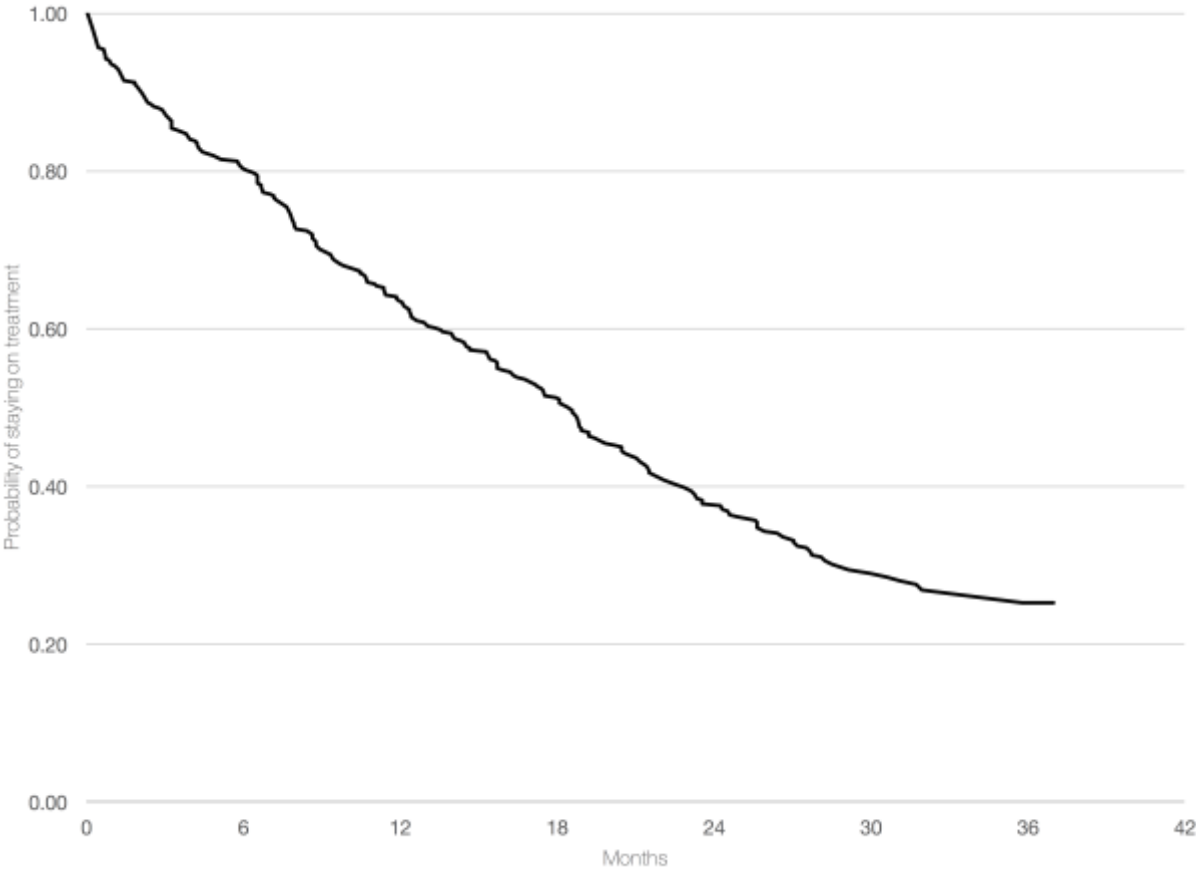

## Online Resource 6. Sensitivity analyses

Treatment gap = 30 days

Persistence with DMF in treatment-naïve DMF patients and in patients switching to DMF from other DMTs

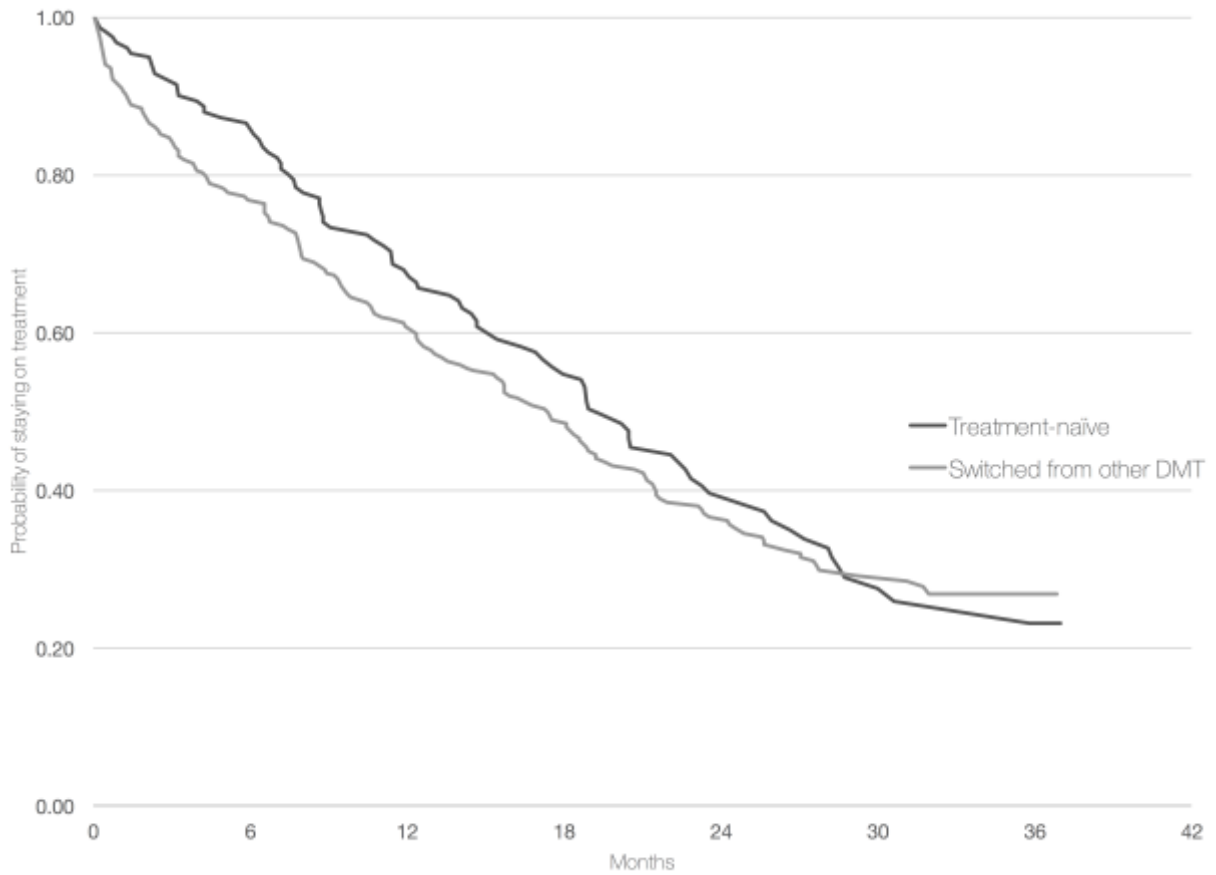

**Online Resource 6. Sensitivity analyses**

Treatment gap = 180 days  
Persistence with DMF in all patients initiating DMF

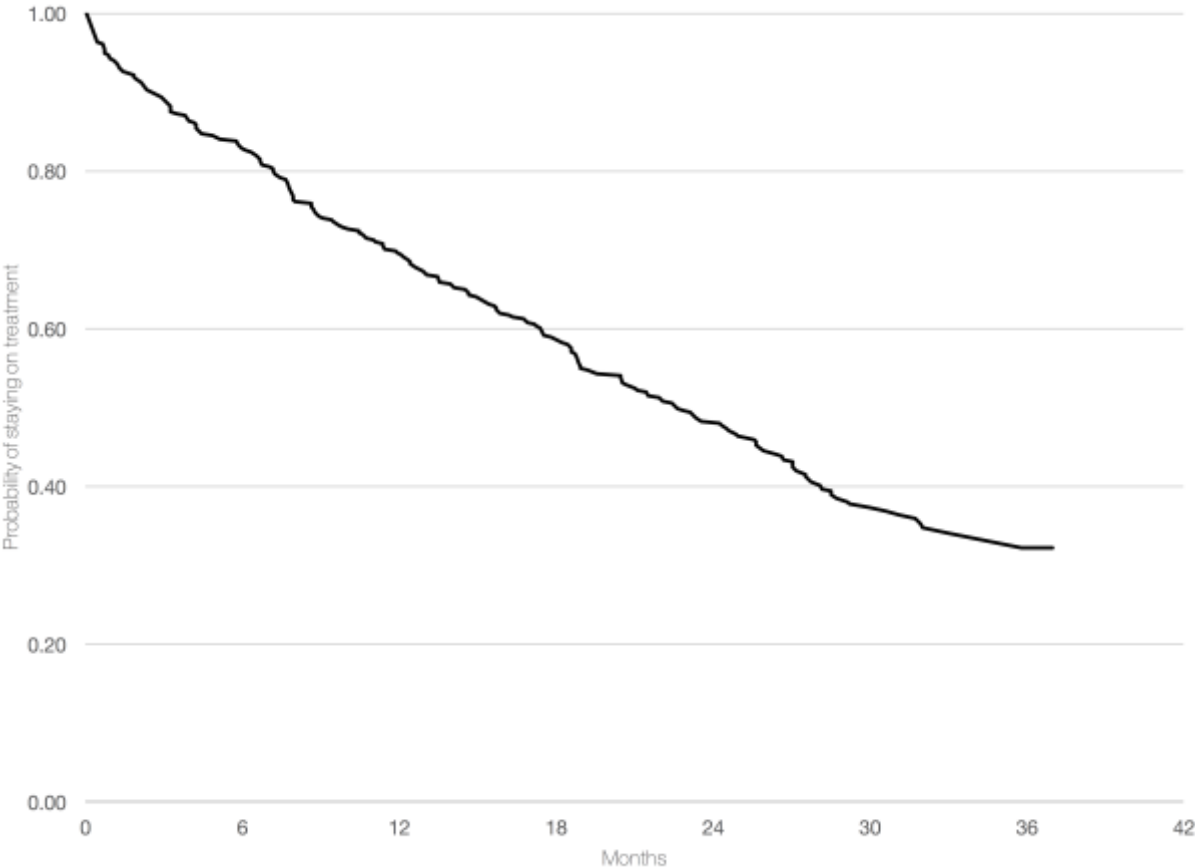

## Online Resource 6. Sensitivity analyses

Treatment gap = 180 days

Persistence with DMF in treatment-naïve DMF patients and in patients switching to DMF from other DMTs

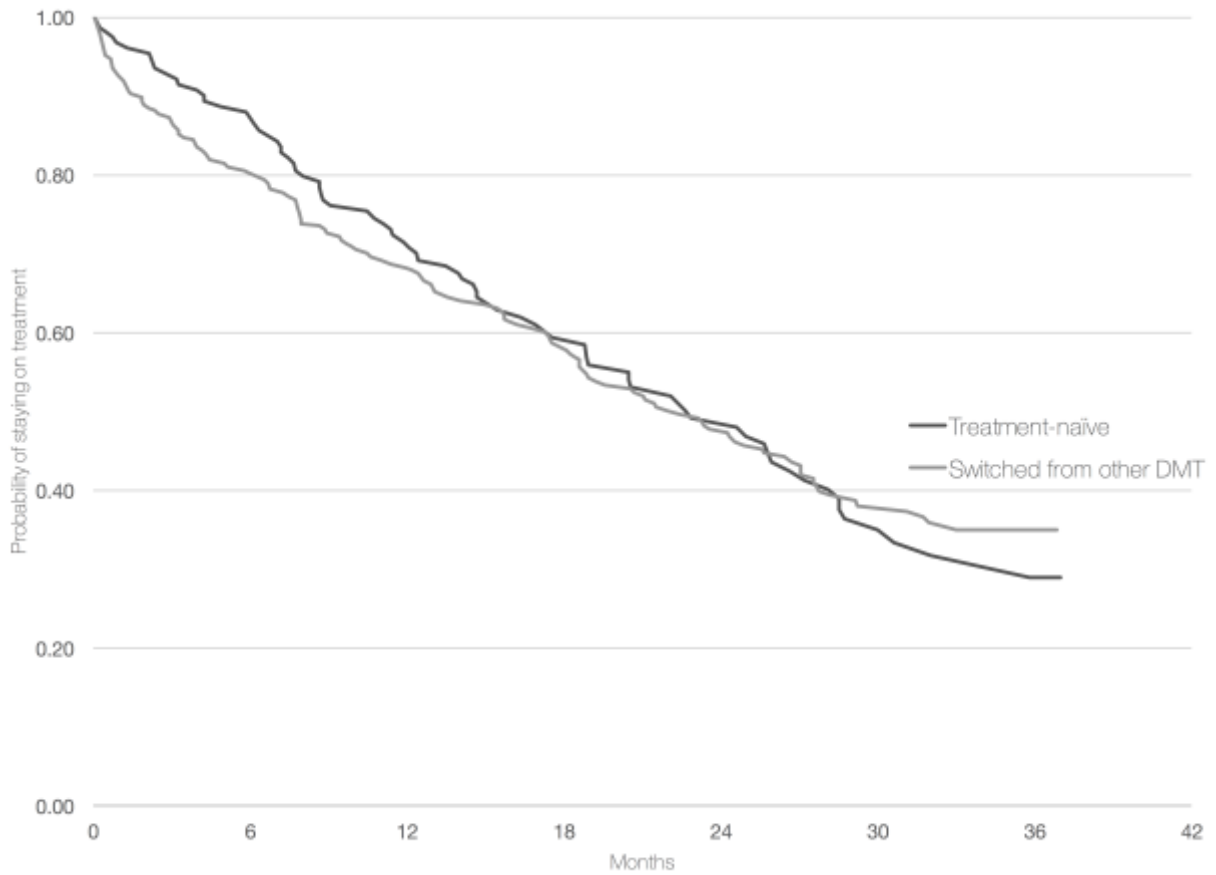

Supplement: 228_2017_2366_MOESM6_ESM.pdf [file 228_2017_2366_MOESM6_ESM.pdf]
